# Supplementary material for: Augmenting surveys with social media discourse on the workings of democracy from a cross-national perspective
Source: Frontiers journal article supplement (doi:10.3389/fpos.2024.1385678), 2024-09-17
Supplement: Data_Sheet_1.pdf [file Data_Sheet_1.pdf]

## *Supplementary Material*

### 1 Supplementary Table

**Supplementary Table 1:** keyword to select tweets related to democracy (English version)

| Keywords in English   | ...continues                | ...continues         |
|-----------------------|-----------------------------|----------------------|
| democracy             | illiberal.*                 | repressive           |
| democrat              | imperialism                 | republic             |
| democratic.*          | imperium                    | republican.*         |
| democratisation       | judiciary                   | rightist             |
| democratization       | kleptocracy                 | rule of law          |
| democrats             | leftist                     | ruler.*              |
| abstention            | legislative                 | secularis.*          |
| activis.*             | local government            | senate               |
| aristocracy           | majoritarianis.*            | senator.*            |
| autarchy              | majority rule               | separation of powers |
| authoritar.*          | misgovernance               | slave                |
| autocra.*             | misrule                     | slavery              |
| bureaucracy           | mobocracy                   | sortition            |
| centrist.*            | monarch.*                   | sovereign.*          |
| citizenry             | monocracy                   | statesman            |
| civil society         | multiparty                  | statesperson         |
| civil liberties       | nationhood                  | stateswoman          |
| civil rights          | nonpartisanship             | statism              |
| commonwealth          | oppression                  | statocracy           |
| consensus             | oligarchy                   | suffrage             |
| consociational        | parliament.*                | superstate           |
| constituency          | MPs                         | suzerain.*           |
| constitution.*        | MP                          | totalitari.*         |
| constitutionalization | elected politician.*        | totalitarian.*       |
| deliberation.*        | elected representative.*    | tyranny              |
| despotis.*            | representative.*            | unilateralis.*       |
| dictator.*            | congressm.*                 | vote                 |
| dominion              | parpolity                   | voter.*              |
| egalitarianis.*       | partisanship                | voting               |
| egovernment           | political parties           | welfare state        |
| e-government          | party state                 | welfarism            |
| election.*            | petition.*                  |                      |
| electoral             | pluralism                   |                      |
| empowerment           | plutocra.*                  |                      |
| equality              | political opposition        |                      |
| establishment         | political orientation       |                      |
| executive             | political representation    |                      |
| popular initiative    | politicians                 |                      |
| federalis.*           | polity                      |                      |
| federaliz.*           | polyarchy                   |                      |
| feudalism             | populis.*                   |                      |
| freedom               | presidential                |                      |
| freedom of speech     | proportional representation |                      |
| freedom of the press  | radicalis.*                 |                      |
| gerontocracy          | realpolitik                 |                      |
| governance            | referenda                   |                      |

|                                                              |                                                  |  |
|--------------------------------------------------------------|--------------------------------------------------|--|
| . *government.*<br>governor.*<br>grassroot.*<br>human rights | referendum<br>reformers<br>reforms<br>repression |  |
|--------------------------------------------------------------|--------------------------------------------------|--|
